# Supplementary material for: Genetic separation of southern and northern soybean breeding programs in North America and their associated allelic variation at four maturity loci
Source: PubMed Central journal article supplement (PMC5226990; doi:10.1007/s11032-016-0611-7), 2017-01-11
Supplement: 11032_2016_611_MOESM1_ESM.pdf [file 11032_2016_611_MOESM1_ESM.pdf]

|                        |                |           | Glyma.10G221400   |                   |                   |                   | E2: Glyma.10G221500 |                   |                   |                   | Glyma.10G221800   |         |                 |       |  |  |
|------------------------|----------------|-----------|-------------------|-------------------|-------------------|-------------------|---------------------|-------------------|-------------------|-------------------|-------------------|---------|-----------------|-------|--|--|
| cultivar               | maturity group | haplotype | chr10: 45,283,870 | chr10: 45,305,285 | chr10: 45,305,867 | chr10: 45,310,798 | chr10: 45,315,921   | chr10: 45,325,450 | chr10: 45,331,070 | chr10: 45,331,299 | chr10: 45,331,446 | E2 FPKM | average E2 FPKM |       |  |  |
| Mandarin (Ottawa)      | 0              | 1         | C                 | G                 | T                 | T                 | T                   | A                 | C                 | C                 | T                 | 8.65    | 9.71 +/- 2.43   |       |  |  |
| Merit                  | 0              |           | C                 | G                 | T                 | T                 | T                   | T                 | A                 | C                 | C                 | T       |                 | 13.98 |  |  |
| Blackhawk              | I              |           | C                 | G                 | T                 | T                 | T                   | T                 | A                 | C                 | C                 | T       |                 | 8.48  |  |  |
| Chippewa               | I              |           | C                 | G                 | T                 | T                 | T                   | T                 | A                 | C                 | C                 | T       |                 | 13.44 |  |  |
| Mandarin               | I              |           | C                 | G                 | T                 | T                 | T                   | T                 | A                 | C                 | C                 | T       |                 | 6.50  |  |  |
| Amsoy                  | II             |           | C                 | G                 | T                 | T                 | T                   | T                 | A                 | C                 | C                 | T       |                 | 7.57  |  |  |
| Beeson                 | II             |           | C                 | G                 | T                 | T                 | T                   | T                 | A                 | C                 | C                 | T       |                 | 12.92 |  |  |
| Century                | II             |           | C                 | G                 | T                 | T                 | T                   | T                 | A                 | C                 | C                 | T       |                 | 9.22  |  |  |
| Harosoy                | II             |           | C                 | G                 | T                 | T                 | T                   | T                 | A                 | C                 | C                 | T       |                 | 9.37  |  |  |
| Mukden                 | II             |           | C                 | G                 | T                 | T                 | T                   | T                 | A                 | C                 | C                 | T       |                 | 6.11  |  |  |
| Richland               | II             |           | C                 | G                 | T                 | T                 | T                   | T                 | A                 | C                 | C                 | T       |                 | 8.71  |  |  |
| Adams                  | III            |           | C                 | G                 | T                 | T                 | T                   | T                 | A                 | C                 | C                 | T       |                 | 9.90  |  |  |
| Calland                | III            |           | C                 | G                 | T                 | T                 | T                   | T                 | A                 | C                 | C                 | T       |                 | 9.09  |  |  |
| Dunfield               | III            |           | C                 | G                 | T                 | T                 | T                   | T                 | A                 | C                 | C                 | T       |                 | 10.21 |  |  |
| Pella                  | III            | C         | G                 | T                 | T                 | T                 | T                   | A                 | C                 | C                 | T                 | 7.52    |                 |       |  |  |
| PI 71506               | IV             | C         | G                 | T                 | T                 | T                 | T                   | A                 | C                 | C                 | T                 | 9.84    |                 |       |  |  |
| PI 171442              | V              | C         | G                 | T                 | T                 | T                 | T                   | A                 | C                 | C                 | T                 | 13.55   |                 |       |  |  |
| Capital                | 0              | 2         | T                 | A                 | G                 | A                 | C                   | G                 | G                 | T                 | C                 | 24.81   | 21.99 +/- 3.77  |       |  |  |
| Amcor                  | II             |           | T                 | A                 | G                 | A                 | C                   | G                 | G                 | T                 | C                 | 24.58   |                 |       |  |  |
| Corsoy                 | II             |           | T                 | A                 | G                 | A                 | C                   | G                 | G                 | T                 | C                 | 14.96   |                 |       |  |  |
| Harcor                 | II             |           | T                 | A                 | G                 | A                 | C                   | G                 | G                 | T                 | C                 | 17.67   |                 |       |  |  |
| Jack                   | II             |           | T                 | A                 | G                 | A                 | C                   | G                 | G                 | T                 | C                 | 17.66   |                 |       |  |  |
| PI 88788               | III            |           | T                 | A                 | G                 | A                 | C                   | G                 | G                 | T                 | C                 | 29.71   |                 |       |  |  |
| Cumberland             | III            |           | T                 | A                 | G                 | A                 | C                   | G                 | G                 | T                 | C                 | 17.78   |                 |       |  |  |
| Ford                   | III            |           | T                 | A                 | G                 | A                 | C                   | G                 | G                 | T                 | C                 | 22.72   |                 |       |  |  |
| Illini / A.K. (Harrow) | III            |           | T                 | A                 | G                 | A                 | C                   | G                 | G                 | T                 | C                 | 20.00   |                 |       |  |  |
| Manchu                 | III            |           | T                 | A                 | G                 | A                 | C                   | G                 | G                 | T                 | C                 | 22.82   |                 |       |  |  |
| Oakland                | III            |           | T                 | A                 | G                 | A                 | C                   | G                 | G                 | T                 | C                 | 18.37   |                 |       |  |  |
| Shelby                 | III            |           | T                 | A                 | G                 | A                 | C                   | G                 | G                 | T                 | C                 | 21.88   |                 |       |  |  |
| Wayne                  | III            |           | T                 | A                 | G                 | A                 | C                   | G                 | G                 | T                 | C                 | 24.74   |                 |       |  |  |
| Williams               | III            |           | T                 | A                 | G                 | A                 | C                   | G                 | G                 | T                 | C                 | 19.58   |                 |       |  |  |
| Williams 82            | III            |           | T                 | A                 | G                 | A                 | C                   | G                 | G                 | T                 | C                 | 21.12   |                 |       |  |  |
| Woodworth              | III            |           | T                 | A                 | G                 | A                 | C                   | G                 | G                 | T                 | C                 | 25.90   |                 |       |  |  |
| Zane                   | III            |           | T                 | A                 | G                 | A                 | C                   | G                 | G                 | T                 | C                 | 27.46   |                 |       |  |  |
| Clark                  | IV             |           | T                 | A                 | G                 | A                 | C                   | G                 | G                 | T                 | C                 | 22.92   |                 |       |  |  |
| Douglas                | IV             |           | T                 | A                 | G                 | A                 | C                   | G                 | G                 | T                 | C                 | 21.74   |                 |       |  |  |
| Lawrence               | IV             |           | T                 | A                 | G                 | A                 | C                   | G                 | G                 | T                 | C                 | 26.21   |                 |       |  |  |
| Perry                  | IV             |           | T                 | A                 | G                 | A                 | C                   | G                 | G                 | T                 | C                 | 19.82   |                 |       |  |  |
| 5601T                  | V              |           | T                 | A                 | G                 | A                 | C                   | G                 | G                 | T                 | C                 | 15.72   |                 |       |  |  |
| Essex                  | V              |           | T                 | A                 | G                 | A                 | C                   | G                 | G                 | T                 | C                 | 18.38   |                 |       |  |  |
| Hill                   | V              |           | T                 | A                 | G                 | A                 | C                   | G                 | G                 | T                 | C                 | 19.71   |                 |       |  |  |
| S-100                  | V              |           | T                 | A                 | G                 | A                 | C                   | G                 | G                 | T                 | C                 | 26.46   |                 |       |  |  |
| Brim                   | VI             |           | T                 | A                 | G                 | A                 | C                   | G                 | G                 | T                 | C                 | 22.97   |                 |       |  |  |
| Centennial             | VI             |           | T                 | A                 | G                 | A                 | C                   | G                 | G                 | T                 | C                 | 23.38   |                 |       |  |  |
| FC 31745               | VI             |           | T                 | A                 | G                 | A                 | C                   | G                 | G                 | T                 | C                 | 9.32    |                 |       |  |  |
| Haberlandt             | VI             |           | T                 | A                 | G                 | A                 | C                   | G                 | G                 | T                 | C                 | 21.28   |                 |       |  |  |
| Lee                    | VI             |           | T                 | A                 | G                 | A                 | C                   | G                 | G                 | T                 | C                 | 20.08   |                 |       |  |  |
| NC-Roy                 | VI             |           | T                 | A                 | G                 | A                 | C                   | G                 | G                 | T                 | C                 | 21.50   |                 |       |  |  |
| Pickett                | VI             |           | T                 | A                 | G                 | A                 | C                   | G                 | G                 | T                 | C                 | 19.91   |                 |       |  |  |
| Tracy                  | VI             | T         | A                 | G                 | A                 | C                 | G                   | G                 | T                 | C                 | 23.36             |         |                 |       |  |  |
| Bragg                  | VII            | T         | A                 | G                 | A                 | C                 | G                   | G                 | T                 | C                 | 19.59             |         |                 |       |  |  |
| Braxton                | VII            | T         | A                 | G                 | A                 | C                 | G                   | G                 | T                 | C                 | 20.89             |         |                 |       |  |  |
| GaSoy17                | VII            | T         | A                 | G                 | A                 | C                 | G                   | G                 | T                 | C                 | 24.21             |         |                 |       |  |  |
| Cook                   | VIII           | T         | A                 | G                 | A                 | C                 | G                   | G                 | T                 | C                 | 19.70             |         |                 |       |  |  |
| Bonus                  | IV             | 3         | C                 | G                 | T                 | A                 | T                   | A                 | C                 | C                 | T                 | 29.23   |                 |       |  |  |
| Kent                   | IV             |           | C                 | G                 | T                 | A                 | T                   | A                 | C                 | C                 | T                 | 20.31   |                 |       |  |  |
| Dare                   | V              |           | C                 | G                 | T                 | A                 | T                   | A                 | C                 | C                 | T                 | 20.15   |                 |       |  |  |
| Dorman                 | V              |           | C                 | G                 | T                 | A                 | T                   | A                 | C                 | C                 | T                 | 27.74   |                 |       |  |  |
| Hutcheson              | V              |           | C                 | G                 | T                 | A                 | T                   | A                 | C                 | C                 | T                 | 21.65   |                 |       |  |  |
| Arksoy                 | VI             |           | C                 | G                 | T                 | A                 | T                   | A                 | C                 | C                 | T                 | 19.51   |                 |       |  |  |
| Davis                  | VI             |           | C                 | G                 | T                 | A                 | T                   | A                 | C                 | C                 | T                 | 28.91   |                 |       |  |  |
| Dillon                 | VI             |           | C                 | G                 | T                 | A                 | T                   | A                 | C                 | C                 | T                 | 22.18   |                 |       |  |  |
| Hood                   | VI             |           | C                 | G                 | T                 | A                 | T                   | A                 | C                 | C                 | T                 | 25.82   |                 |       |  |  |
| Ogden                  | VI             |           | C                 | G                 | T                 | A                 | T                   | A                 | C                 | C                 | T                 | 26.39   |                 |       |  |  |
| Raisoy                 | VI             |           | C                 | G                 | T                 | A                 | T                   | A                 | C                 | C                 | T                 | 19.61   |                 |       |  |  |
| Young                  | VI             |           | C                 | G                 | T                 | A                 | T                   | A                 | C                 | C                 | T                 | 25.35   |                 |       |  |  |
| Hagood                 | VII            |           | C                 | G                 | T                 | A                 | T                   | A                 | C                 | C                 | T                 | 16.94   |                 |       |  |  |
| Jackson                | VII            |           | C                 | G                 | T                 | A                 | T                   | A                 | C                 | C                 | T                 | 20.28   |                 |       |  |  |
| NC-Raleigh             | VII            | C         | G                 | T                 | A                 | T                 | A                   | C                 | C                 | T                 | 23.96             |         |                 |       |  |  |
| Ransom                 | VII            | C         | G                 | T                 | A                 | T                 | A                   | C                 | C                 | T                 | 24.89             |         |                 |       |  |  |
| Roanoke                | VII            | C         | G                 | T                 | A                 | T                 | A                   | C                 | C                 | T                 | 21.71             |         |                 |       |  |  |
| Tokyo                  | VII            | C         | G                 | T                 | A                 | T                 | A                   | C                 | C                 | T                 | 22.88             |         |                 |       |  |  |
| Volstate               | VII            | C         | G                 | T                 | A                 | T                 | A                   | C                 | C                 | T                 | 24.97             |         |                 |       |  |  |
| CNS                    | VII            | 4         | T                 | G                 | T                 | A                 | T                   | A                 | C                 | C                 | T                 | 21.79   |                 |       |  |  |
