# Supplementary material for: Genetic separation of southern and northern soybean breeding programs in North America and their associated allelic variation at four maturity loci
Source: PubMed Central journal article supplement (PMC5226990; doi:10.1007/s11032-016-0611-7), 2017-01-11

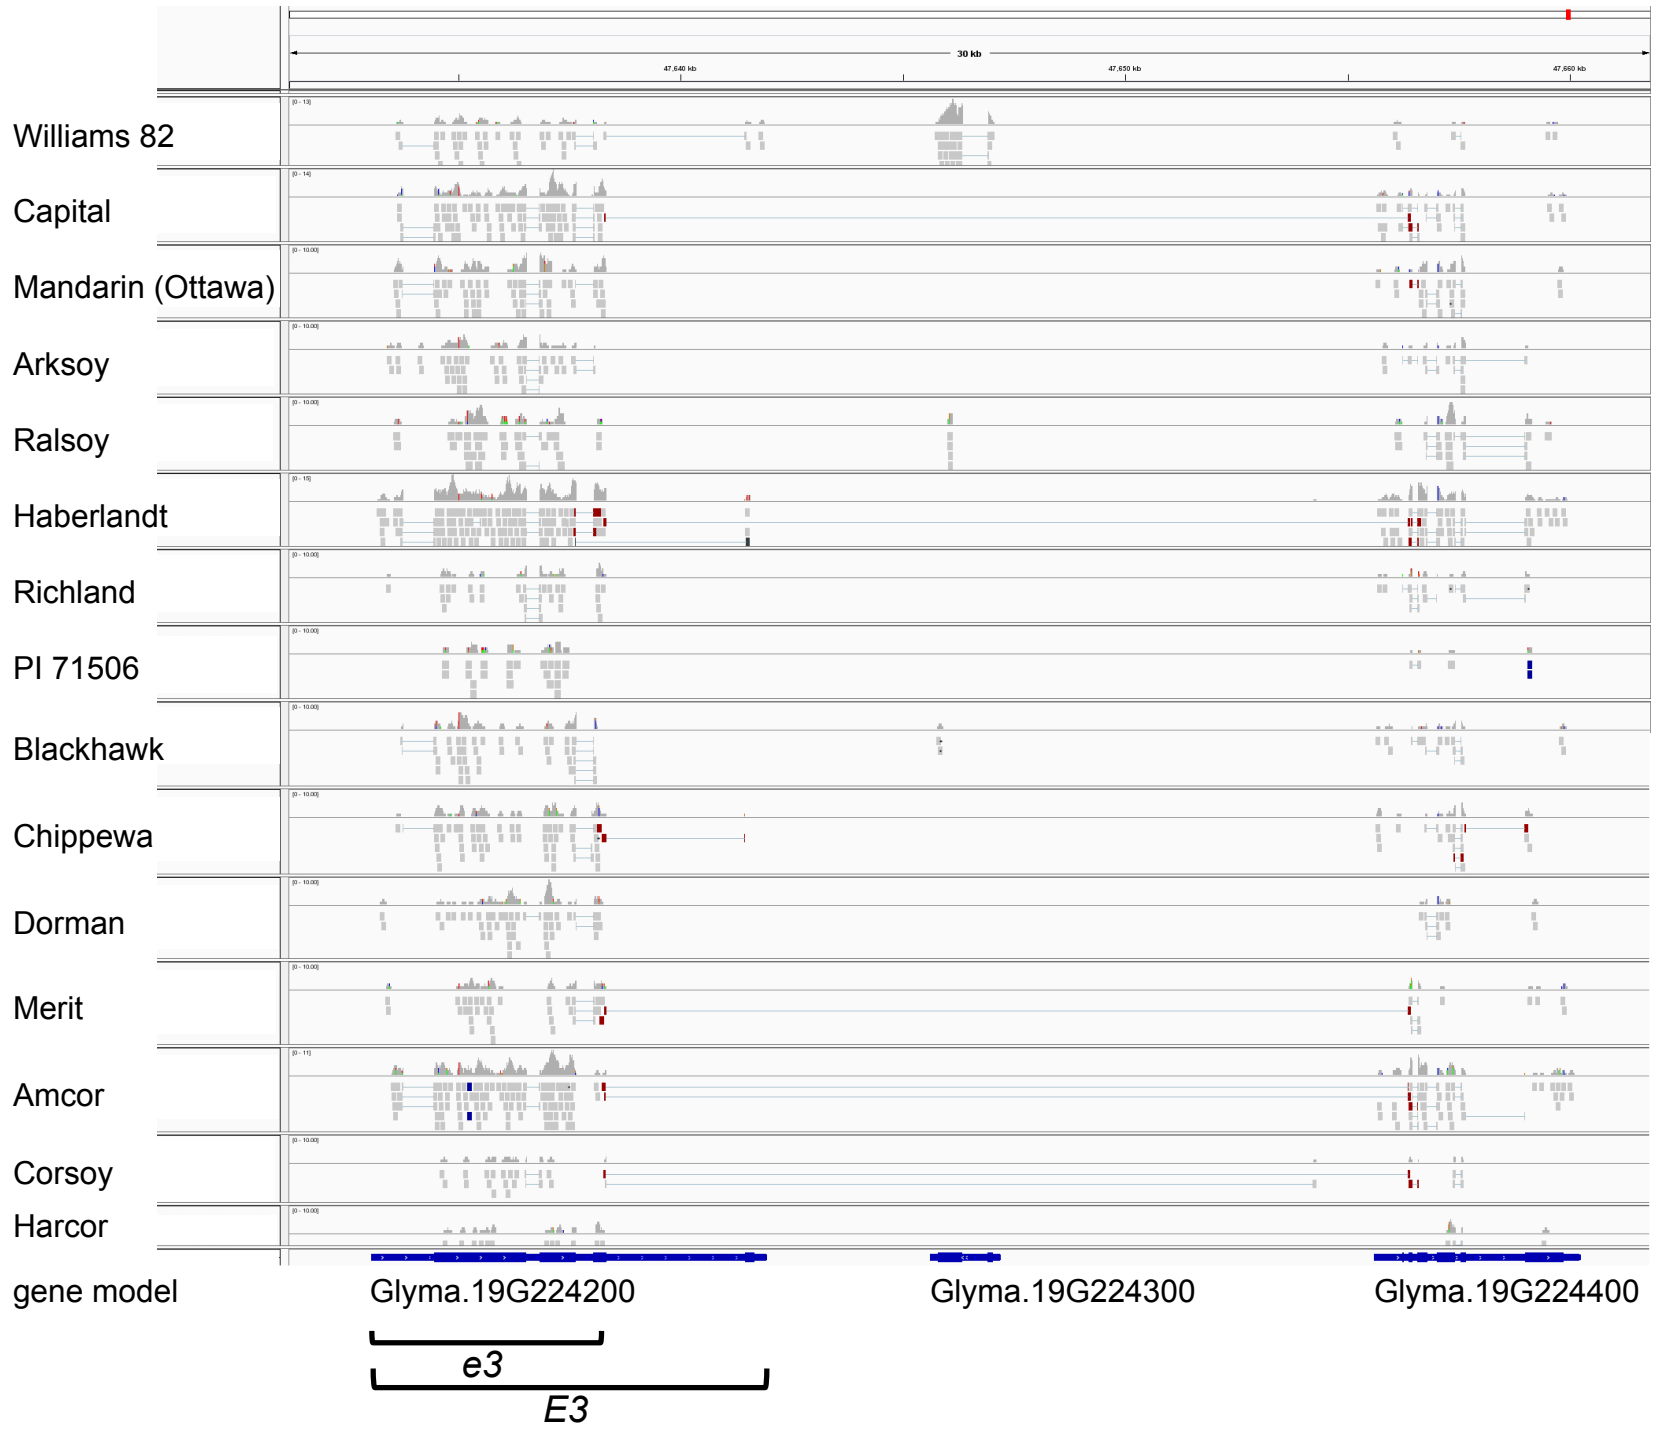

Supplement: 11032_2016_611_MOESM3_ESM.pdf [file 11032_2016_611_MOESM3_ESM.pdf]
