# Supplementary material for: Genetic separation of southern and northern soybean breeding programs in North America and their associated allelic variation at four maturity loci
Source: PubMed Central journal article supplement (PMC5226990; doi:10.1007/s11032-016-0611-7), 2017-01-11
Supplement: 11032_2016_611_MOESM4_ESM.pdf [file 11032_2016_611_MOESM4_ESM.pdf]

|                        |                |           | Glyma.19G222600   | Glyma.19G223300   | Glyma.19G223600   | Glyma.19G224000   |                   |                   |                   |                   |                   |                   | E3: Glyma.19G224200 | Glyma.19G224700   |                   |                   |                   |                               |                   |                   |                   |         |                 |         |
|------------------------|----------------|-----------|-------------------|-------------------|-------------------|-------------------|-------------------|-------------------|-------------------|-------------------|-------------------|-------------------|---------------------|-------------------|-------------------|-------------------|-------------------|-------------------------------|-------------------|-------------------|-------------------|---------|-----------------|---------|
| Name                   | maturity group | haplotype | chr19: 47,482,154 | chr19: 47,563,387 | chr19: 47,564,597 | chr19: 47,565,073 | chr19: 47,588,397 | chr19: 47,590,801 | chr19: 47,593,289 | chr19: 47,621,874 | chr19: 47,622,105 | chr19: 47,622,563 | chr19: 47,622,567   | chr19: 47,622,630 | chr19: 47,623,288 | chr19: 47,625,022 | chr19: 47,625,541 | chr19: 47,633,059..47,641,988 | chr19: 47,694,111 | chr19: 47,694,639 | chr19: 47,695,273 | E3 FPKM | average E3 FPKM |         |
| Capital                | 0              |           | C                 | G                 | A                 | C                 | T                 | A                 | C                 | G                 | G                 | T                 | A                   | A                 | C                 | A                 | C                 | e3                            | G                 | C                 | A                 | A       | 0.54            |         |
| Mandarin (Ottawa)      | 0              |           | C                 | G                 | A                 | C                 | T                 | A                 | C                 | G                 | G                 | T                 | A                   | A                 | C                 | A                 | C                 | e3                            | G                 | C                 | A                 | A       | 0.99            |         |
| Merit                  | 0              |           | C                 | G                 | A                 | C                 | T                 | A                 | C                 | G                 | G                 | T                 | A                   | A                 | C                 | A                 | C                 | e3                            | G                 | C                 | A                 | A       | 0.46            |         |
| Blackhawk              | I              |           | C                 | G                 | A                 | C                 | T                 | A                 | C                 | G                 | G                 | T                 | A                   | A                 | C                 | A                 | C                 | e3                            | G                 | C                 | A                 | A       | 0.72            |         |
| Chippewa               | I              |           | C                 | G                 | A                 | C                 | T                 | A                 | C                 | G                 | G                 | T                 | A                   | A                 | C                 | A                 | C                 | e3                            | G                 | C                 | A                 | A       | 0.76            |         |
| Richland               | I              |           | C                 | G                 | A                 | C                 | T                 | A                 | C                 | G                 | G                 | T                 | A                   | A                 | C                 | A                 | C                 | e3                            | G                 | C                 | A                 | A       | 0.54            |         |
| Amcor                  | II             | 1         | C                 | G                 | A                 | C                 | T                 | A                 | C                 | G                 | G                 | T                 | A                   | A                 | C                 | A                 | C                 | e3                            | G                 | C                 | A                 | A       | 0.88            | 0.71 +) |
| Corsoy                 | II             | 1         | C                 | G                 | A                 | C                 | T                 | A                 | C                 | G                 | G                 | T                 | A                   | A                 | C                 | A                 | C                 | e3                            | G                 | C                 | A                 | A       | 0.35            | 0.24    |
| Harcor                 | II             | 1         | C                 | G                 | A                 | C                 | T                 | A                 | C                 | G                 | G                 | T                 | A                   | A                 | C                 | A                 | C                 | e3                            | G                 | C                 | A                 | A       | 0.50            |         |
| PI 71506               | IV             |           | C                 | G                 | A                 | C                 | T                 | A                 | C                 | G                 | G                 | T                 | A                   | A                 | C                 | A                 | C                 | e3                            | G                 | C                 | A                 | A       | 0.79            |         |
| Dorman                 | V              |           | C                 | G                 | A                 | C                 | T                 | A                 | C                 | G                 | G                 | T                 | A                   | A                 | C                 | A                 | C                 | e3                            | G                 | C                 | A                 | A       | 1.07            |         |
| Haberlandt             | VI             |           | C                 | G                 | A                 | C                 | T                 | A                 | C                 | G                 | G                 | T                 | A                   | A                 | C                 | A                 | C                 | e3                            | G                 | C                 | A                 | A       | 1.09            |         |
| Arksoy                 | VI             |           | C                 | G                 | A                 | C                 | T                 | A                 | C                 | G                 | G                 | T                 | A                   | A                 | C                 | A                 | C                 | e3                            | G                 | C                 | A                 | A       | 0.43            |         |
| Raisoy                 | VI             |           | C                 | G                 | A                 | C                 | T                 | A                 | C                 | G                 | G                 | T                 | A                   | A                 | C                 | A                 | C                 | e3                            | G                 | C                 | A                 | A       | 0.82            |         |
| Perry                  | IV             | 2         | C                 | A                 | G                 | A                 | C                 | A                 | C                 | A                 | T                 | C                 | G                   | G                 | T                 | T                 | C                 | E3                            | T                 | A                 | G                 | A       | 1.23            |         |
| FC 31745               | VI             | 2         | C                 | A                 | G                 | A                 | C                 | A                 | C                 | A                 | T                 | C                 | G                   | G                 | T                 | T                 | C                 | E3                            | T                 | A                 | G                 | A       | 0.88            |         |
| Volstate               | VII            | 2         | C                 | A                 | G                 | A                 | C                 | A                 | C                 | A                 | T                 | C                 | G                   | G                 | T                 | T                 | C                 | E3                            | T                 | A                 | G                 | A       | 0.69            |         |
| Essex                  | V              | 3         | A                 | A                 | G                 | A                 | C                 | A                 | C                 | A                 | T                 | C                 | G                   | G                 | T                 | T                 | T                 | E3                            | T                 | A                 | G                 | A       | 1.32            |         |
| Hill                   | V              | 3         | A                 | A                 | G                 | A                 | C                 | A                 | C                 | A                 | T                 | C                 | G                   | G                 | T                 | T                 | T                 | E3                            | T                 | A                 | G                 | A       | 1.48            |         |
| PI 171442              | V              | 3         | A                 | A                 | G                 | A                 | C                 | A                 | C                 | A                 | T                 | C                 | G                   | G                 | T                 | T                 | T                 | E3                            | T                 | A                 | G                 | A       | 1.46            |         |
| Tracy                  | VI             | 3         | A                 | A                 | G                 | A                 | C                 | A                 | C                 | A                 | T                 | C                 | G                   | G                 | T                 | T                 | T                 | E3                            | T                 | A                 | G                 | A       | 0.65            |         |
| Dillon                 | VI             | 3         | A                 | A                 | G                 | A                 | C                 | A                 | C                 | A                 | T                 | C                 | G                   | G                 | T                 | T                 | T                 | E3                            | T                 | A                 | G                 | A       | 1.36            |         |
| Lee                    | VI             | 3         | A                 | A                 | G                 | A                 | C                 | A                 | C                 | A                 | T                 | C                 | G                   | G                 | T                 | T                 | T                 | E3                            | T                 | A                 | G                 | A       | 1.60            |         |
| Pickett                | VI             | 3         | A                 | A                 | G                 | A                 | C                 | A                 | C                 | A                 | T                 | C                 | G                   | G                 | T                 | T                 | T                 | E3                            | T                 | A                 | G                 | A       | 0.78            |         |
| Young                  | VI             | 3         | A                 | A                 | G                 | A                 | C                 | A                 | C                 | A                 | T                 | C                 | G                   | G                 | T                 | T                 | T                 | E3                            | T                 | A                 | G                 | A       | 0.68            |         |
| CNS                    | VII            | 3         | A                 | A                 | G                 | A                 | C                 | A                 | C                 | A                 | T                 | C                 | G                   | G                 | T                 | T                 | T                 | E3                            | T                 | A                 | G                 | A       | 0.71            |         |
| Tokyo                  | VII            | 3         | A                 | A                 | G                 | A                 | C                 | A                 | C                 | A                 | T                 | C                 | G                   | G                 | T                 | T                 | T                 | E3                            | T                 | A                 | G                 | A       | 0.90            |         |
| Hagood                 | VII            | 3         | A                 | A                 | G                 | A                 | C                 | A                 | C                 | A                 | T                 | C                 | G                   | G                 | T                 | T                 | T                 | E3                            | T                 | A                 | G                 | A       | 1.25            |         |
| Hood                   | VI             | 4         | C                 | A                 | G                 | A                 | C                 | A                 | C                 | A                 | T                 | C                 | G                   | G                 | T                 | T                 | T                 | E3                            | T                 | A                 | G                 | A       | 1.49            |         |
| Mukden                 | I              | 5         | C                 | G                 | A                 | C                 | C                 | G                 | T                 | G                 | G                 | C                 | A                   | A                 | C                 | A                 | C                 | E3                            | T                 | C                 | G                 | A       | 0.62            |         |
| Mandarin               | I              | 6         | C                 | G                 | A                 | C                 | C                 | G                 | T                 | G                 | G                 | C                 | A                   | A                 | C                 | A                 | C                 | E3                            | G                 | C                 | A                 | A       | 0.83            |         |
| Amsoy                  | II             | 6         | C                 | G                 | A                 | C                 | C                 | G                 | T                 | G                 | G                 | C                 | A                   | A                 | C                 | A                 | C                 | E3                            | G                 | C                 | A                 | A       | 0.76            |         |
| Beeson                 | II             | 6         | C                 | G                 | A                 | C                 | C                 | G                 | T                 | G                 | G                 | C                 | A                   | A                 | C                 | A                 | C                 | E3                            | G                 | C                 | A                 | A       | 0.43            |         |
| Century                | II             | 6         | C                 | G                 | A                 | C                 | C                 | G                 | T                 | G                 | G                 | C                 | A                   | A                 | C                 | A                 | C                 | E3                            | G                 | C                 | A                 | A       | 0.68            |         |
| Harosoy                | II             | 6         | C                 | G                 | A                 | C                 | C                 | G                 | T                 | G                 | G                 | C                 | A                   | A                 | C                 | A                 | C                 | E3                            | G                 | C                 | A                 | A       | 0.61            |         |
| Jack                   | II             | 6         | C                 | G                 | A                 | C                 | C                 | G                 | T                 | G                 | G                 | C                 | A                   | A                 | C                 | A                 | C                 | E3                            | G                 | C                 | A                 | A       | 0.89            |         |
| Dunfield               | III            | 6         | C                 | G                 | A                 | C                 | C                 | G                 | T                 | G                 | G                 | C                 | A                   | A                 | C                 | A                 | C                 | E3                            | G                 | C                 | A                 | A       | 0.76            |         |
| Illini / A.K. (Harrow) | III            | 6         | C                 | G                 | A                 | C                 | C                 | G                 | T                 | G                 | G                 | C                 | A                   | A                 | C                 | A                 | C                 | E3                            | G                 | C                 | A                 | A       | 0.33            |         |
| Manchu                 | III            | 6         | C                 | G                 | A                 | C                 | C                 | G                 | T                 | G                 | G                 | C                 | A                   | A                 | C                 | A                 | C                 | E3                            | G                 | C                 | A                 | A       | 1.38            |         |
| PI 88788               | III            | 6         | C                 | G                 | A                 | C                 | C                 | G                 | T                 | G                 | G                 | C                 | A                   | A                 | C                 | A                 | C                 | E3                            | G                 | C                 | A                 | A       | 0.65            |         |
| Adams                  | III            | 6         | C                 | G                 | A                 | C                 | C                 | G                 | T                 | G                 | G                 | C                 | A                   | A                 | C                 | A                 | C                 | E3                            | G                 | C                 | A                 | A       | 0.56            |         |
| Calland                | III            | 6         | C                 | G                 | A                 | C                 | C                 | G                 | T                 | G                 | G                 | C                 | A                   | A                 | C                 | A                 | C                 | E3                            | G                 | C                 | A                 | A       | 1.12            |         |
| Cumberland             | III            | 6         | C                 | G                 | A                 | C                 | C                 | G                 | T                 | G                 | G                 | C                 | A                   | A                 | C                 | A                 | C                 | E3                            | G                 | C                 | A                 | A       | 1.12            |         |
| Ford                   | III            | 6         | C                 | G                 | A                 | C                 | C                 | G                 | T                 | G                 | G                 | C                 | A                   | A                 | C                 | A                 | C                 | E3                            | G                 | C                 | A                 | A       | 1.01            | 0.98 +) |
| Oakland                | III            | 6         | C                 | G                 | A                 | C                 | C                 | G                 | T                 | G                 | G                 | C                 | A                   | A                 | C                 | A                 | C                 | E3                            | G                 | C                 | A                 | A       | 1.19            | 0.33    |
| Pella                  | III            | 6         | C                 | G                 | A                 | C                 | C                 | G                 | T                 | G                 | G                 | C                 | A                   | A                 | C                 | A                 | C                 | E3                            | G                 | C                 | A                 | A       | 0.98            |         |
| Shelby                 | III            | 6         | C                 | G                 | A                 | C                 | C                 | G                 | T                 | G                 | G                 | C                 | A                   | A                 | C                 | A                 | C                 | E3                            | G                 | C                 | A                 | A       | 1.25            |         |
| Wayne                  | III            | 6         | C                 | G                 | A                 | C                 | C                 | G                 | T                 | G                 | G                 | C                 | A                   | A                 | C                 | A                 | C                 | E3                            | G                 | C                 | A                 | A       | 1.51            |         |
| Williams               | III            | 6         | C                 | G                 | A                 | C                 | C                 | G                 | T                 | G                 | G                 | C                 | A                   | A                 | C                 | A                 | C                 | E3                            | G                 | C                 | A                 | A       | 0.77            |         |
| Williams 82            | III            | 6         | C                 | G                 | A                 | C                 | C                 | G                 | T                 | G                 | G                 | C                 | A                   | A                 | C                 | A                 | C                 | E3                            | G                 | C                 | A                 | A       | 0.77            |         |
| Woodworth              | III            | 6         | C                 | G                 | A                 | C                 | C                 | G                 | T                 | G                 | G                 | C                 | A                   | A                 | C                 | A                 | C                 | E3                            | G                 | C                 | A                 | A       | 1.39            |         |
| Zane                   | III            | 6         | C                 | G                 | A                 | C                 | C                 | G                 | T                 | G                 | G                 | C                 | A                   | A                 | C                 | A                 | C                 | E3                            | G                 | C                 | A                 | A       | 0.73            |         |
| Bonus                  | IV             | 6         | C                 | G                 | A                 | C                 | C                 | G                 | T                 | G                 | G                 | C                 | A                   | A                 | C                 | A                 | C                 | E3                            | G                 | C                 | A                 | A       | 1.01            |         |
| Clark                  | IV             | 6         | C                 | G                 | A                 | C                 | C                 | G                 | T                 | G                 | G                 | C                 | A                   | A                 | C                 | A                 | C                 | E3                            | G                 | C                 | A                 | A       | 1.45            |         |
| Douglas                | IV             | 6         | C                 | G                 | A                 | C                 | C                 | G                 | T                 | G                 | G                 | C                 | A                   | A                 | C                 | A                 | C                 | E3                            | G                 | C                 | A                 | A       | 1.27            |         |
| Kent                   | IV             | 6         | C                 | G                 | A                 | C                 | C                 | G                 | T                 | G                 | G                 | C                 | A                   | A                 | C                 | A                 | C                 | E3                            | G                 | C                 | A                 | A       | 1.63            |         |
| Lawrence               | IV             | 6         | C                 | G                 | A                 | C                 | C                 | G                 | T                 | G                 | G                 | C                 | A                   | A                 | C                 | A                 | C                 | E3                            | G                 | C                 | A                 | A       | 1.29            |         |
| Hutcheson              | V              | 6         | C                 | G                 | A                 | C                 | C                 | G                 | T                 | G                 | G                 | C                 | A                   | A                 | C                 | A                 | C                 | E3                            | G                 | C                 | A                 | A       | 0.81            |         |
| 5601T                  | V              | 6         | C                 | G                 | A                 | C                 | C                 | G                 | T                 | G                 | G                 | C                 | A                   | A                 | C                 | A                 | C                 | E3                            | G                 | C                 | A                 | A       | 1.44            |         |
| Dare                   | V              | 6         | C                 | G                 | A                 | C                 | C                 | G                 | T                 | G                 | G                 | C                 | A                   | A                 | C                 | A                 | C                 | E3                            | G                 | C                 | A                 | A       | 0.81            |         |
| S-100                  | V              | 6         | C                 | G                 | A                 | C                 | C                 | G                 | T                 | G                 | G                 | C                 | A                   | A                 | C                 | A                 | C                 | E3                            | G                 | C                 | A                 | A       | 0.51            |         |
| Ogden                  | VI             | 6         | C                 | G                 | A                 | C                 | C                 | G                 | T                 | G                 | G                 | C                 | A                   | A                 | C                 | A                 | C                 | E3                            | G                 | C                 | A                 | A       | 0.59            |         |
| Brim                   | VI             | 6         | C                 | G                 | A                 | C                 | C                 | G                 | T                 | G                 | G                 | C                 | A                   | A                 | C                 | A                 | C                 | E3                            | G                 | C                 | A                 | A       | 1.22            |         |
| NC-Roy                 | VI             | 6         | C                 | G                 | A                 | C                 | C                 | G                 | T                 | G                 | G                 | C                 | A                   | A                 | C                 | A                 | C                 | E3                            | G                 | C                 | A                 | A       | 0.98            |         |
| Centennial             | VI             | 6         | C                 | G                 | A                 | C                 | C                 | G                 | T                 | G                 | G                 | C                 | A                   | A                 | C                 | A                 | C                 | E3                            | G                 | C                 | A                 | A       | 0.90            |         |
| Davis                  | VI             | 6         | C                 | G                 | A                 | C                 | C                 | G                 | T                 | G                 | G                 | C                 | A                   | A                 | C                 | A                 | C                 | E3                            | G                 | C                 | A                 | A       | 0.62            |         |
| Ransom                 | VII            | 6         | C                 | G                 | A                 | C                 | C                 | G                 | T                 | G                 | G                 | C                 | A                   | A                 | C                 | A                 | C                 | E3                            | G                 | C                 | A                 | A       | 1.52            |         |
| Roanoke                | VII            | 6         | C                 | G                 | A                 | C                 | C                 | G                 | T                 | G                 | G                 | C                 | A                   | A                 | C                 | A                 | C                 | E3                            | G                 | C                 | A                 | A       | 0.78            |         |
| Bragg                  | VII            | 6         | C                 | G                 | A                 | C                 | C                 | G                 | T                 | G                 | G                 | C                 | A                   | A                 | C                 | A                 | C                 | E3                            | G                 | C                 | A                 | A       | 0.78            |         |
| Braxton                | VII            | 6         | C                 | G                 | A                 | C                 | C                 | G                 | T                 | G                 | G                 | C                 | A                   | A                 | C                 | A                 | C                 | E3                            | G                 | C                 | A                 | A       | 0.85            |         |
| GaSoy17                | VII            | 6         | C                 | G                 | A                 | C                 | C                 | G                 | T                 | G                 | G                 | C                 | A                   | A                 | C                 | A                 | C                 | E3                            | G                 | C                 | A                 | A       | 0.91            |         |
|                        |                |           |                   |                   |                   |                   |                   |                   |                   |                   |                   |                   |                     |                   |                   |                   |                   |                               |                   |                   |                   |         |                 |         |
