# Supplementary material for: Genetic separation of southern and northern soybean breeding programs in North America and their associated allelic variation at four maturity loci
Source: Mol Breed. 2017 Jan 11;37(1):8. doi: 10.1007/s11032-016-0611-7 (PMC5226990; doi:10.1007/s11032-016-0611-7)
Supplement: Supplementary file 6 — E1 haplotypes. Six haplotypes containing the E1 gene are presented here. The e1 mutant allele is situated in haplotype 1. E1 is not expressed in seeds, therefore sequence or expression polymorphisms among our lines are not available for direct genotyping. The E1 gene is framed in red at the proper chromosomal position in the SNP table. Note that Williams 82, which shares haplotype 1 with 27 additional landraces and milestone varieties, carries the e1-as mutant allele. The haplotypes are presented in the same format as in Suppl. Figure 1A (see legend of Suppl. Figure 1A for more information). (PDF 50 kb) [file 11032_2016_611_MOESM6_ESM.pdf]

|                        |                |           |                   |                   |                   |                   | Glyma.06G205000   | E1:<br>Glyma.06G207800        | Glyma.06G209000   | Glyma.06G209700   |                   |                   |                   |                   |                   |                   |                   |                   |                   |                   |                   |                   |                   |                   |                   |   |
|------------------------|----------------|-----------|-------------------|-------------------|-------------------|-------------------|-------------------|-------------------------------|-------------------|-------------------|-------------------|-------------------|-------------------|-------------------|-------------------|-------------------|-------------------|-------------------|-------------------|-------------------|-------------------|-------------------|-------------------|-------------------|-------------------|---|
|                        |                |           | Glvma.06G204500   |                   |                   |                   |                   |                               |                   |                   | Glvma.06G210400   |                   |                   |                   |                   |                   | Glvma.06G211400   |                   |                   |                   |                   |                   |                   |                   |                   |   |
| Name                   | maturity group | haplotype | chr06: 19,275,883 | chr06: 19,277,953 | chr06: 19,278,170 | chr06: 19,278,692 | chr06: 19,372,774 | chr06: 20,207,077..20,207,940 | chr06: 20,532,951 | chr06: 20,661,062 | chr06: 20,768,647 | chr06: 20,768,767 | chr06: 20,768,938 | chr06: 20,773,898 | chr06: 20,773,958 | chr06: 20,778,554 | chr06: 21,093,956 | chr06: 21,094,533 | chr06: 21,094,699 | chr06: 21,100,565 | chr06: 21,100,574 | chr06: 21,100,644 | chr06: 21,100,762 | chr06: 21,100,867 | chr06: 21,100,890 |   |
| Capital                | 0              | 1         | T                 | G                 | C                 | A                 | G                 | ef-as                         | T                 | T                 | C                 | C                 | T                 | C                 | C                 | G                 | G                 | G                 | G                 | A                 | T                 | G                 | T                 | A                 | A                 |   |
| Mandarin (Ottawa)      | 0              |           | T                 | G                 | C                 | A                 | G                 | ef-as                         | T                 | T                 | C                 | C                 | T                 | C                 | C                 | C                 | G                 | G                 | G                 | G                 | A                 | T                 | G                 | T                 | A                 | A |
| Chippewa               | I              |           | T                 | G                 | C                 | A                 | G                 | ef-as                         | T                 | T                 | C                 | C                 | T                 | C                 | C                 | C                 | G                 | G                 | G                 | G                 | A                 | T                 | G                 | T                 | A                 | A |
| Mandarin               | I              |           | T                 | G                 | C                 | A                 | G                 | ef-as                         | T                 | T                 | C                 | C                 | T                 | C                 | C                 | C                 | G                 | G                 | G                 | G                 | A                 | T                 | G                 | T                 | A                 | A |
| Amcor                  | II             |           | T                 | G                 | C                 | A                 | G                 | ef-as                         | T                 | T                 | C                 | C                 | T                 | C                 | C                 | C                 | G                 | G                 | G                 | G                 | A                 | T                 | G                 | T                 | A                 | A |
| Amsoy                  | II             |           | T                 | G                 | C                 | A                 | G                 | ef-as                         | T                 | T                 | C                 | C                 | T                 | C                 | C                 | C                 | G                 | G                 | G                 | G                 | A                 | T                 | G                 | T                 | A                 | A |
| Century                | II             |           | T                 | G                 | C                 | A                 | G                 | ef-as                         | T                 | T                 | C                 | C                 | T                 | C                 | C                 | C                 | G                 | G                 | G                 | G                 | A                 | T                 | G                 | T                 | A                 | A |
| Corsoy                 | II             |           | T                 | G                 | C                 | A                 | G                 | ef-as                         | T                 | T                 | C                 | C                 | T                 | C                 | C                 | C                 | G                 | G                 | G                 | G                 | A                 | T                 | G                 | T                 | A                 | A |
| Harcor                 | II             |           | T                 | G                 | C                 | A                 | G                 | ef-as                         | T                 | T                 | C                 | C                 | T                 | C                 | C                 | C                 | G                 | G                 | G                 | G                 | A                 | T                 | G                 | T                 | A                 | A |
| Harosoy                | II             |           | T                 | G                 | C                 | A                 | G                 | ef-as                         | T                 | T                 | C                 | C                 | T                 | C                 | C                 | C                 | G                 | G                 | G                 | G                 | A                 | T                 | G                 | T                 | A                 | A |
| Jack                   | II             |           | T                 | G                 | C                 | A                 | G                 | ef-as                         | T                 | T                 | C                 | C                 | T                 | C                 | C                 | C                 | G                 | G                 | G                 | G                 | A                 | T                 | G                 | T                 | A                 | A |
| Calland                | III            |           | T                 | G                 | C                 | A                 | G                 | ef-as                         | T                 | T                 | C                 | C                 | T                 | C                 | C                 | C                 | G                 | G                 | G                 | G                 | A                 | T                 | G                 | T                 | A                 | A |
| Cumberland             | III            |           | T                 | G                 | C                 | A                 | G                 | ef-as                         | T                 | T                 | C                 | C                 | T                 | C                 | C                 | C                 | G                 | G                 | G                 | G                 | A                 | T                 | G                 | T                 | A                 | A |
| Ford                   | III            |           | T                 | G                 | C                 | A                 | G                 | ef-as                         | T                 | T                 | C                 | C                 | T                 | C                 | C                 | C                 | G                 | G                 | G                 | G                 | A                 | T                 | G                 | T                 | A                 | A |
| Manchu                 | III            |           | T                 | G                 | C                 | A                 | G                 | ef-as                         | T                 | T                 | C                 | C                 | T                 | C                 | C                 | C                 | G                 | G                 | G                 | G                 | A                 | T                 | G                 | T                 | A                 | A |
| Oakland                | III            |           | T                 | G                 | C                 | A                 | G                 | ef-as                         | T                 | T                 | C                 | C                 | T                 | C                 | C                 | C                 | G                 | G                 | G                 | G                 | A                 | T                 | G                 | T                 | A                 | A |
| Pella                  | III            |           | T                 | G                 | C                 | A                 | G                 | ef-as                         | T                 | T                 | C                 | C                 | T                 | C                 | C                 | C                 | G                 | G                 | G                 | G                 | A                 | T                 | G                 | T                 | A                 | A |
| Shelby                 | III            |           | T                 | G                 | C                 | A                 | G                 | ef-as                         | T                 | T                 | C                 | C                 | T                 | C                 | C                 | C                 | G                 | G                 | G                 | G                 | A                 | T                 | G                 | T                 | A                 | A |
| Wayne                  | III            |           | T                 | G                 | C                 | A                 | G                 | ef-as                         | T                 | T                 | C                 | C                 | T                 | C                 | C                 | C                 | G                 | G                 | G                 | G                 | A                 | T                 | G                 | T                 | A                 | A |
| Williams 82            | III            |           | T                 | G                 | C                 | A                 | G                 | ef-as                         | T                 | T                 | C                 | C                 | T                 | C                 | C                 | C                 | G                 | G                 | G                 | G                 | A                 | T                 | G                 | T                 | A                 | A |
| Williams               | III            |           | T                 | G                 | C                 | A                 | G                 | ef-as                         | T                 | T                 | C                 | C                 | T                 | C                 | C                 | C                 | G                 | G                 | G                 | G                 | A                 | T                 | G                 | T                 | A                 | A |
| Woodworth              | III            |           | T                 | G                 | C                 | A                 | G                 | ef-as                         | T                 | T                 | C                 | C                 | T                 | C                 | C                 | C                 | G                 | G                 | G                 | G                 | A                 | T                 | G                 | T                 | A                 | A |
| Zane                   | III            |           | T                 | G                 | C                 | A                 | G                 | ef-as                         | T                 | T                 | C                 | C                 | T                 | C                 | C                 | C                 | G                 | G                 | G                 | G                 | A                 | T                 | G                 | T                 | A                 | A |
| Bonus                  | IV             |           | T                 | G                 | C                 | A                 | G                 | ef-as                         | T                 | T                 | C                 | C                 | T                 | C                 | C                 | C                 | G                 | G                 | G                 | G                 | A                 | T                 | G                 | T                 | A                 | A |
| Clark                  | IV             |           | T                 | G                 | C                 | A                 | G                 | ef-as                         | T                 | T                 | C                 | C                 | T                 | C                 | C                 | C                 | G                 | G                 | G                 | G                 | A                 | T                 | G                 | T                 | A                 | A |
| Douglas                | IV             |           | T                 | G                 | C                 | A                 | G                 | ef-as                         | T                 | T                 | C                 | C                 | T                 | C                 | C                 | C                 | G                 | G                 | G                 | G                 | A                 | T                 | G                 | T                 | A                 | A |
| Kent                   | IV             |           | T                 | G                 | C                 | A                 | G                 | ef-as                         | T                 | T                 | C                 | C                 | T                 | C                 | C                 | C                 | G                 | G                 | G                 | G                 | A                 | T                 | G                 | T                 | A                 | A |
| Lawrence               | IV             |           | T                 | G                 | C                 | A                 | G                 | ef-as                         | T                 | T                 | C                 | C                 | T                 | C                 | C                 | C                 | G                 | G                 | G                 | G                 | A                 | T                 | G                 | T                 | A                 | A |
| Richland               | II             | 2         | T                 | G                 | C                 | C                 | A                 | E1                            | T                 | T                 | C                 | C                 | T                 | C                 | C                 | G                 | G                 | G                 | G                 | A                 | T                 | G                 | T                 | A                 | A                 |   |
| Perry                  | IV             |           | T                 | G                 | C                 | C                 | A                 | E1                            | T                 | T                 | C                 | C                 | T                 | C                 | C                 | C                 | G                 | G                 | G                 | G                 | A                 | T                 | G                 | T                 | A                 | A |
| Merit                  | 0              | 3         | T                 | G                 | C                 | C                 | A                 | E1                            | C                 | A                 | C                 | T                 | T                 | C                 | T                 | G                 | G                 | G                 | G                 | A                 | T                 | A                 | T                 | A                 | A                 |   |
| Blackhawk              | I              |           | T                 | G                 | C                 | C                 | A                 | E1                            | C                 | A                 | C                 | T                 | T                 | C                 | T                 | G                 | G                 | G                 | G                 | A                 | T                 | A                 | T                 | A                 | A                 |   |
| Beeson                 | II             |           | T                 | G                 | C                 | C                 | A                 | E1                            | C                 | A                 | C                 | T                 | T                 | C                 | T                 | G                 | G                 | G                 | G                 | A                 | T                 | A                 | T                 | A                 | A                 |   |
| Mukden                 | II             | 4         | T                 | A                 | T                 | C                 | A                 | E1                            | C                 | A                 | C                 | T                 | T                 | C                 | T                 | G                 | G                 | G                 | G                 | A                 | T                 | A                 | T                 | A                 | A                 |   |
| PI 88788               | III            |           | T                 | A                 | T                 | C                 | A                 | E1                            | C                 | A                 | C                 | T                 | T                 | C                 | T                 | G                 | G                 | G                 | G                 | A                 | T                 | A                 | T                 | A                 | A                 |   |
| Adams                  | III            |           | T                 | A                 | T                 | C                 | A                 | E1                            | C                 | A                 | C                 | T                 | T                 | C                 | T                 | G                 | G                 | G                 | G                 | A                 | T                 | A                 | T                 | A                 | A                 |   |
| Illini / A.K. (Harrow) | III            |           | T                 | A                 | T                 | C                 | A                 | E1                            | C                 | A                 | C                 | T                 | T                 | C                 | T                 | G                 | G                 | G                 | G                 | A                 | T                 | A                 | T                 | A                 | A                 |   |
| S-100                  | V              |           | T                 | A                 | T                 | C                 | A                 | E1                            | C                 | A                 | C                 | T                 | T                 | C                 | T                 | G                 | G                 | G                 | G                 | A                 | T                 | A                 | T                 | A                 | A                 |   |
| FC 31745               | VI             | 5         | T                 | G                 | C                 | C                 | A                 | E1                            | T                 | T                 | A                 | C                 | G                 | T                 | T                 | A                 | A                 | A                 | A                 | T                 | C                 | G                 | C                 | G                 | G                 |   |
| Haberlandt             | VI             |           | T                 | G                 | C                 | C                 | A                 | E1                            | T                 | T                 | A                 | C                 | G                 | T                 | T                 | A                 | A                 | A                 | A                 | T                 | C                 | G                 | C                 | G                 | G                 |   |
| Tokyo                  | VII            |           | T                 | G                 | C                 | C                 | A                 | E1                            | T                 | T                 | A                 | C                 | G                 | T                 | T                 | A                 | A                 | A                 | A                 | T                 | C                 | G                 | C                 | G                 | G                 |   |
| Dunfield               | III            | 6         | C                 | G                 | C                 | C                 | A                 | E1                            | T                 | T                 | A                 | C                 | G                 | T                 | T                 | A                 | A                 | A                 | A                 | T                 | C                 | G                 | C                 | G                 | G                 |   |
| PI 71506               | IV             |           | C                 | G                 | C                 | C                 | A                 | E1                            | T                 | T                 | A                 | C                 | G                 | T                 | T                 | A                 | A                 | A                 | A                 | T                 | C                 | G                 | C                 | G                 | G                 |   |
| PI 171442              | V              |           | C                 | G                 | C                 | C                 | A                 | E1                            | T                 | T                 | A                 | C                 | G                 | T                 | T                 | A                 | A                 | A                 | A                 | T                 | C                 | G                 | C                 | G                 | G                 |   |
| Dare                   | V              |           | C                 | G                 | C                 | C                 | A                 | E1                            | T                 | T                 | A                 | C                 | G                 | T                 | T                 | A                 | A                 | A                 | A                 | T                 | C                 | G                 | C                 | G                 | G                 |   |
| Essex                  | V              |           | C                 | G                 | C                 | C                 | A                 | E1                            | T                 | T                 | A                 | C                 | G                 | T                 | T                 | A                 | A                 | A                 | A                 | T                 | C                 | G                 | C                 | G                 | G                 |   |
| Hill                   | V              |           | C                 | G                 | C                 | C                 | A                 | E1                            | T                 | T                 | A                 | C                 | G                 | T                 | T                 | A                 | A                 | A                 | A                 | T                 | C                 | G                 | C                 | G                 | G                 |   |
| 5601T                  | V              |           | C                 | G                 | C                 | C                 | A                 | E1                            | T                 | T                 | A                 | C                 | G                 | T                 | T                 | A                 | A                 | A                 | A                 | T                 | C                 | G                 | C                 | G                 | G                 |   |
| Dorman                 | V              |           | C                 | G                 | C                 | C                 | A                 | E1                            | T                 | T                 | A                 | C                 | G                 | T                 | T                 | A                 | A                 | A                 | A                 | T                 | C                 | G                 | C                 | G                 | G                 |   |
| Hutcheson              | V              |           | C                 | G                 | C                 | C                 | A                 | E1                            | T                 | T                 | A                 | C                 | G                 | T                 | T                 | A                 | A                 | A                 | A                 | T                 | C                 | G                 | C                 | G                 | G                 |   |
| Ogden                  | VI             |           | C                 | G                 | C                 | C                 | A                 | E1                            | T                 | T                 | A                 | C                 | G                 | T                 | T                 | A                 | A                 | A                 | A                 | T                 | C                 | G                 | C                 | G                 | G                 |   |
| Brim                   | VI             |           | C                 | G                 | C                 | C                 | A                 | E1                            | T                 | T                 | A                 | C                 | G                 | T                 | T                 | A                 | A                 | A                 | A                 | T                 | C                 | G                 | C                 | G                 | G                 |   |
| Davis                  | VI             |           | C                 | G                 | C                 | C                 | A                 | E1                            | T                 | T                 | A                 | C                 | G                 | T                 | T                 | A                 | A                 | A                 | A                 | T                 | C                 | G                 | C                 | G                 | G                 |   |
| Dillon                 | VI             |           | C                 | G                 | C                 | C                 | A                 | E1                            | T                 | T                 | A                 | C                 | G                 | T                 | T                 | A                 | A                 | A                 | A                 | T                 | C                 | G                 | C                 | G                 | G                 |   |
| Hood                   | VI             |           | C                 | G                 | C                 | C                 | A                 | E1                            | T                 | T                 | A                 | C                 | G                 | T                 | T                 | A                 | A                 | A                 | A                 | T                 | C                 | G                 | C                 | G                 | G                 |   |
| Lee                    | VI             |           | C                 | G                 | C                 | C                 | A                 | E1                            | T                 | T                 | A                 | C                 | G                 | T                 | T                 | A                 | A                 | A                 | A                 | T                 | C                 | G                 | C                 | G                 | G                 |   |
| NC-Roy                 | VI             |           | C                 | G                 | C                 | C                 | A                 | E1                            | T                 | T                 | A                 | C                 | G                 | T                 | T                 | A                 | A                 | A                 | A                 | T                 | C                 | G                 | C                 | G                 | G                 |   |
| Tracy                  | VI             |           | C                 | G                 | C                 | C                 | A                 | E1                            | T                 | T                 | A                 | C                 | G                 | T                 | T                 | A                 | A                 | A                 | A                 | T                 | C                 | G                 | C                 | G                 | G                 |   |
| Young                  | VI             |           | C                 | G                 | C                 | C                 | A                 | E1                            | T                 | T                 | A                 | C                 | G                 | T                 | T                 | A                 | A                 | A                 | A                 | T                 | C                 | G                 | C                 | G                 | G                 |   |
| Arksoy                 | VI             |           | C                 | G                 | C                 | C                 | A                 | E1                            | T                 | T                 | A                 | C                 | G                 | T                 | T                 | A                 | A                 | A                 | A                 | T                 | C                 | G                 | C                 | G                 | G                 |   |
| Ralsoy                 | VI             |           | C                 | G                 | C                 | C                 | A                 | E1                            | T                 | T                 | A                 | C                 | G                 | T                 | T                 | A                 | A                 | A                 | A                 | T                 | C                 | G                 | C                 | G                 | G                 |   |
| Centennial             | VI             |           | C                 | G                 | C                 | C                 | A                 | E1                            | T                 | T                 | A                 | C                 | G                 | T                 | T                 | A                 | A                 | A                 | A                 | T                 | C                 | G                 | C                 | G                 | G                 |   |
| Pickett                | VI             |           | C                 | G                 | C                 | C                 | A                 | E1                            | T                 | T                 | A                 | C                 | G                 | T                 | T                 | A                 | A                 | A                 | A                 | T                 | C                 | G                 | C                 | G                 | G                 |   |
| CNS                    | VII            |           | C                 | G                 | C                 | C                 | A                 | E1                            | T                 | T                 | A                 | C                 | G                 | T                 | T                 | A                 | A                 | A                 | A                 | T                 | C                 | G                 | C                 | G                 | G                 |   |
| Roanoke                | VII            |           | C                 | G                 | C                 | C                 | A                 | E1                            | T                 | T                 | A                 | C                 | G                 | T                 | T                 | A                 | A                 | A                 | A                 | T                 | C                 | G                 | C                 | G                 | G                 |   |
| Volstate               | VII            |           | C                 | G                 | C                 | C                 | A                 | E1                            | T                 | T                 | A                 | C                 | G                 | T                 | T                 | A                 | A                 | A                 | A                 | T                 | C                 | G                 | C                 | G                 | G                 |   |
| Bragg                  | VII            |           | C                 | G                 | C                 | C                 | A                 | E1                            | T                 | T                 | A                 | C                 | G                 | T                 | T                 | A                 | A                 | A                 | A                 | T                 | C                 | G                 | C                 | G                 | G                 |   |
| Braxton                | VII            |           | C                 | G                 | C                 | C                 | A                 | E1                            | T                 | T                 | A                 | C                 | G                 | T                 | T                 | A                 | A                 | A                 | A                 | T                 | C                 | G                 | C                 | G                 | G                 |   |
| GaSoy17                | VII            | C         | G                 | C                 | C                 | A                 | E1                | T                             | T                 | A                 | C                 | G                 | T                 | T                 | A                 | A                 | A                 | A                 | T                 | C                 | G                 | C                 | G                 | G                 |                   |   |
| Hagood                 | VII            | C         | G                 | C                 | C                 | A                 | E1                | T                             | T                 | A                 | C                 | G                 | T                 | T                 | A                 | A                 | A                 | A                 | T                 | C                 | G                 | C                 | G                 | G                 |                   |   |
| Jackson                | VII            | C         | G                 | C                 | C                 | A                 | E1                | T                             | T                 | A                 | C                 | G                 | T                 | T                 | A                 | A                 | A                 | A                 | T                 | C                 | G                 | C                 | G                 | G                 |                   |   |
| NC-Raleigh             | VII            | C         | G                 | C                 | C                 | A                 | E1                | T                             | T                 | A                 | C                 | G                 | T                 | T                 | A                 | A                 | A                 | A                 | T                 | C                 | G                 | C                 | G                 | G                 |                   |   |
| Ransom                 | VII            | C         | G                 | C                 | C                 | A                 | E1                | T                             | T                 | A                 | C                 | G                 | T                 | T                 | A                 | A                 | A                 | A                 | T                 | C                 | G                 | C                 | G                 | G                 |                   |   |
| Cook                   | VIII           | C         | G                 | C                 | C                 | A                 | E1                | T                             | T                 | A                 | C                 | G                 | T                 | T                 | A                 | A                 | A                 | A                 | T                 | C                 | G                 | C                 | G                 | G                 |                   |   |
